# Supplementary material for: What affects power to estimate speciation rate shifts?
Source: PeerJ journal article supplement (doi:10.7717/peerj.5495), 2018-08-21
Supplement: SupplementalInformation1_AdditionalMethods.pdf [file SupplementalInformation1_AdditionalMethods.pdf]

## Supplemental Information 1: Additional details of the simulation procedure

Part A provides information on pilot runs of Simulation Set 1, Part B on simulation of replicate trees in Simulation Set 1, Part C on pilot runs of Simulation Set 2 and Part D on simulation of replicate trees in Simulation Set 2.

### A) Pilot runs to choose $B_{age}$ for Simulation Set 1

Initial simulations showed that a  $\lambda_0$  value of 0.2 along with a  $\mu$  value of 0.05 allowed us to generate trees with the required parameters, and therefore these values were fixed across all simulations for Set 1. Further pilot runs were conducted using a large range of  $B_{age}$  values to find out which values could result in a given target size class for a given combination of relative *subtree* age and speciation rate asymmetry (Table 1, Section 1b). A pilot run involved randomly choosing an age (in this case,  $B_{age}$ ) between 5 and 35 units, and simulating 1000 trees using the function *tess.sim.age* in the R package TESS. The 1000 trees generated in this way typically varied in size. The function *tess.nTaxa.expected* in the same package gives the expected number of tips for a given speciation rate, extinction rate and tree age. We chose one tree out of the 1000 trees generated in a single run, using correlation tests. The correlation tests were done using the function *cor.test* and involved calculating the correlation coefficient of the expected and simulated numbers of tips at each 1 unit time interval. Because simulated tip numbers were compared with the expected tip numbers, the size of a tree with the highest correlation coefficient best matches the expected tree size. Thus, we computed correlation coefficients for all 1000 simulated trees in a run, and the tree with the highest maximum correlation coefficient was chosen as the tree for that parameter combination. This was designated a *basetree*. For this *basetree*, we calculated the  $S_{age}$  for the given relative *subtree* age and  $\lambda_1$  given the speciation rate asymmetry. We conducted a second run with these parameters to generate 1000 potential *subtrees*. The best among these was chosen using correlation tests, as was done for the *basetree* above. The best *subtree* was grafted onto the *basetree* following pruning of a randomly chosen *basetree* clade with approximately the same age ( $S_{age} \pm 2.5\%$ ). This generated a composite tree. If the size of this composite tree was within one of target size classes, this  $B_{age}$  was used to generate replicate trees for the combination of parameters (see Section B). The procedure was repeated until a suitable  $B_{age}$  and 50 replicate trees were available for all combinations of overall tree size, speciation rate asymmetry and relative *subtree* age.

### B) Generating replicate trees for a parameter combination in Simulation Set 1

Once a  $B_{age}$  was chosen for a combination of tree size class, relative *subtree* age and speciation rate asymmetry (described in Section A), we simulated 50 replicate trees for each parameter combination. Simulation of a replicate tree involved i) simulation of the *basetree* with the associated  $\lambda_0$ ,  $\mu_0$  and  $B_{age}$  using the function *tess.sim.age* ii) simulation of the *subtree* with the associated  $\lambda_1$ ,  $\mu_1$  and  $S_{age}$  iii) grafting of the *subtree* onto the *basetree*. Simulation of the *subtree* and *basetree* both involved runs generating 1000 trees (using the function *tess.sim.age*) and choosing the best among these using correlation tests as described in Section A.

### C) Pilot runs to choose $B_{age}$ , relative subtree age and $\lambda_0$ for Simulation Set 2

Based on initial simulations, we fixed  $\mu$  at 0.05 and speciation rate asymmetry at 2X across all simulations. We aimed to generate trees of 5 overall size classes, with three tip-ratios in each of these size classes (Table 1, Section 1c). In order to achieve this, we defined target *basetree* and *subtree* lineage sizes for each overall tree size class. Therefore, the targets of the simulation here were combinations of lineage sizes in the composite trees. Pilot runs were conducted using a large range of  $B_{\text{age}}$ , relative *subtree* age and  $\lambda_0$  values to find out which values could result in the target *subtree* and *basetree* lineage sizes (that eventually produced a composite tree with the target overall size; Table 1, Section 1c). Therefore, in this Simulation Set, the lineage sizes of the *subtree* and *basetree* were the targets in the simulation, rather than the size of composite tree *per se*. The protocols for the simulating the *subtree* and *basetree* were similar to that used in Simulation Set 1. A run was first conducted using randomly chosen values of  $B_{\text{age}}$  and  $\lambda_0$  to generate 1000 trees. The best among these 1000 was chosen as a potential *basetree* using correlation tests, as in Section A. For the *subtree*, another run generated 1000 trees with a randomly chosen age (i.e.  $S_{\text{age}}$ ) and the  $\lambda_1$  value corresponding to 2X speciation rate asymmetry (in relation to  $\lambda_0$  used in the previous step), with the limitation that the chosen  $S_{\text{age}}$  corresponded to a relative *subtree* age between 30 and 70% (in relation to the  $B_{\text{age}}$  used in the previous step). The best among the 1000 trees was chosen as a potential *subtree*. Once the *subtree* was grafted onto the *basetree*, the *subtree* and *basetree* lineage sizes in the composite tree were calculated. If these matched the target lineage sizes, the combination of  $B_{\text{age}}$ , relative *subtree* age and  $\lambda_0$  were used to generate 100 replicate trees for that pair of lineage sizes. Section D describes how replicates were generated. The procedure was repeated until 100 replicate trees were available for all target lineage size pairs.

#### *D) Generating replicate trees for a parameter combination in Simulation Set 2*

Once a combination of  $B_{\text{age}}$ , relative *subtree* age and  $\lambda_0$  were chosen (described in Section C), we simulated 100 replicate trees for each parameter combination. Simulation of the replicates was the same as for Simulation Set 1.
